# Supplementary material for: WGS Revealed Novel BBS5 Pathogenic Variants, Missed by WES, Causing Ciliary Structure and Function Defects
Source: MDPI journal article supplement (doi:10.3390/ijms24108729), 2023-05-13
Supplement: s1 [file s1]

## SUPPLEMENTARY DATA

### BBS panel sequencing

Next-generation sequencing of the patient's sample was performed on the Ion Torrent PGM (Thermo Fisher Scientific) according to the manufacturer's protocols. DNA libraries were constructed using the HaloPlex Target Enrichment system (Agilent Technologies, version D.5). The design targeted 30 genes of which 17 were BBS genes (*BBS1-BBS17*) for a total of 10,156 amplicons (134.04 kbp). The libraries were barcoded using HaloPlex ION Barcodes (Agilent Technologies) and then pooled by four samples. Emulsion PCR was performed on the Ion One Touch 2 system (Life Technologies) and the emulsion PCR products were enriched on the One Touch 2 Enrichment System using the Ion PGM Template OT2-200 kit (Life Technologies). Ion sphere particles (ISP) were enriched using the E/S module, charged on one Ion PGM 318 v2 chips and sequenced with an Ion Torrent PGM in a 200-bp configuration run. With an ISP loading of 73%, 481 Mb were produced in total out of 2,951,659 reads, with a median length of 166 bp, of which 130.6 Mb could be used for our patient (795,763 reads, median length of 164 bp). Sequencing data were analyzed by the Torrent Suite Software v4.4.2 with alignment to the reference human genome (GRCh37/hg19) (788,342 mapped reads, 48.61% on target) and base calling (SNV/indel). Variant annotation and ranking was performed as for the WGS methods. No specific CNV calling was achieved but depth of coverage comparison was manually checked using the Integrative Genomics Viewer (IGV) software [1].

### Whole-Exome Sequencing

Whole exome sequencing (WES) was performed by the IGBMC Microarray and Sequencing platform. Genomic DNA (2 mg) was sheared to obtain a mean fragment size of 150 bp using the Covaris E210 (KBioscience, Herts, United Kingdom) followed by library preparation using the Agilent SureSelect XT Human all exon V6 (Agilent Technologies, Santa Clara, CA, United States PN G7530-90000, protocol B4). Sequencing was performed on an Illumina HiSeq 2500 (Illumina, San Diego, CA, United States) to generate 100-bp paired-end reads following the manufacturer's protocols. Bioinformatics Analysis Image analysis and base calling were performed using CASAVA v1.8.2 (Illumina), and the 181,329,380 reads were mapped to the reference human genome (GRCh37/hg19) using BWA v0.7.5a [2] leading to 97.26% of the bases covered at least by 20x. GATK UG v3.2-2 was used to call SNV and indel variations [3]. Annotation and ranking of SNV and indel were performed by VaRank 1.4.3 [4] in combination with the Alamut Batch software 1.11 (Interactive Biosoftware, Rouen, France). Very stringent filtering criteria were applied to filter out non-pathogenic variants (Supplementary Table S1): (i) variants represented with an allele frequency of more than 1% in public variation databases including the 1000Genomes [5], the gnomAD database [6], the DGV database [7] or our internal database, (ii) variants in 5' and 3' UTR, downstream, upstream or intronic locations and synonymous without pathogenic prediction of local splice effect, (iii) variants not in the ciliary genes [8]. Structural variants were predicted using CANOES, including mobile element insertion using Mobster [9] and annotated by AnnotSV 2.3 [10]. The analysis was focused on compound heterozygous and homozygous variants consistent with a recessive mode of transmission. Each candidate variations were also checked using the Integrative Genomics Viewer (IGV) software [1].

### Copy number variants calling

Copy number variants have been called using 7 different tools either on the WES data with CNVkit 0.9.9 [11], on the WGS data using CNVpytor 1.2.1 [12], Delly 1.1.5 [13], Lumpy 0.2.13 [14], Smoove 0.2.6 (<https://github.com/brentp/smoove>) based on Lumpy [14], or on both using CANOES v2 [15], Manta 1.6.0 [16] and SoftSV 1.4.2 [17]. Detection results and type of methods are summarized in Supplementary Table S5.

### BBS5 Multiple Sequence Alignment and structure

Protein sequence alignment was built based on the protein sequences extracted from the metazoan orthologous group from the eggNOG database (4.5) [18] including the sequence from the 3D structure of ARL6/BBS3 (PDB: 6VBU, chain A) [19]. The alignment was visualized in Jalview (2.11.0) [20] and the 3D structure in PyMOL (1.3) [21].

|                                                                                                                                            | SNV    | indel  | SV     |         |
|--------------------------------------------------------------------------------------------------------------------------------------------|--------|--------|--------|---------|
|                                                                                                                                            |        |        | CANOES | Mobster |
| Total number of variants                                                                                                                   | 94,460 | 15,592 | 10     | 229     |
| After exclusion of variants with an allele frequency >1% (gnomAD, 1000G, internal exome database or DGV)                                   | 10,178 | 1,635  | 6      | 229     |
| After exclusion of SNV/indel found at the homozygous state in gnomAD                                                                       | 4,669  | 695    |        |         |
| After exclusion of SNV/indel found at the homozygous state in our internal exome database                                                  | 1,486  | 261    |        |         |
| After exclusion of SNV/indel in 5' and 3'UTR, downstream, upstream, intron and synonymous locations without local splice effect prediction | 520    | 88     |        |         |
| After exclusion of missense without SIFT, PPH2 or PhastCons deleterious effect                                                             | 456    | 88     |        |         |
| SV overlapping a morbid gene (OMIM)                                                                                                        |        |        | 0      | 57      |

**Supplementary Table S1.** Summary of the whole exome sequencing results. SNV: single nucleotide variation, indel: gain or loss of up to 50 nucleotides at a single locus, SV: structural variation. Exclusion of SV with a DGV frequency >1% is done only with studies of more than 1000 individuals.

|                                                                                                                                            | SNV/Indel | SV     |        |        |         |
|--------------------------------------------------------------------------------------------------------------------------------------------|-----------|--------|--------|--------|---------|
|                                                                                                                                            |           | CANOES | SoftSV | Lumpy  | Mobster |
| Total number of variants                                                                                                                   | 4,851,744 | 10     | 15,518 | 14,441 | 1,472   |
| After exclusion of variant with an allele frequency >1% (gnomAD)                                                                           | 468,570   | 5      | 13,882 | 10,720 | 1,401   |
| After exclusion of SNV/indel found at the homozygous state in gnomAD                                                                       | 240,450   |        |        |        |         |
| After exclusion of SNV/indel in 5' and 3'UTR, downstream, upstream, intron and synonymous locations without local splice effect prediction | 837       |        |        |        |         |
| After exclusion of missense without SIFT, PPH2 or PhastCons deleterious effect                                                             | 18        |        |        |        |         |
| SV overlapping a morbid gene (OMIM)                                                                                                        |           | 0      | 1348   | 980    | 116     |

**Supplementary Table S2.** Summary of the whole genome sequencing results. SNV: single nucleotide variation, indel: gain or loss of up to 50 nucleotides at a single locus, SV: structural variation. A SV with a DGV frequency >1% is excluded only with studies of more than 1000 individuals.

| Application | Gene name (HGVS) | Exon       | Forward (5'-3')        | Reverse (5'-3')         | Size (bp) |
|-------------|------------------|------------|------------------------|-------------------------|-----------|
| Duplex 1    | <i>BBS5</i>      | F1 and R1  | GGCACCAGGATTCTCATACC   | TGGGTCACTTGAAGTCAGGA    | 389/6309  |
|             | <i>PSMC3</i>     | 7 to 8     | GGCGTGTCCTGAGTTAGAG    | AGGAACCACAATTTAGCACAA   | 603       |
| Duplex 2    | <i>BBS5</i>      | F2 and R2  | TGTACACTCACGTTCTTTGTC  | CAGAGAAGCAGGCTTACAACAG  | 663/6580  |
|             | <i>DISC1</i>     | 10         | ACCCTGTACTTGGAGGTATGTG | ACCCCTGCCCTCCAATATTTGT  | 925       |
| cDNA        | <i>BBS5</i>      | 6-7 to 8   | TCCAGTGATCAGGGCAATTT   | TGAGAGCTTTCTATGACAAGAGC | 167       |
|             | <i>BBS5</i>      | 1 to 3     | ATGCCAAAGAGTGCCAGAGA   | TCCGTTTCGACCTGTCCG      | 153       |
|             | <i>BBS5</i>      | 5-6 to 6-7 | TGGCAGTACACGAGCTTATGA  | TGATCAGGGCAATTTAGGAACC  | 164       |
|             | <i>BBS5</i>      | 9 to 9-10  | GTGGTGGATATGTTCTTGGCT  | CTGGGGCTTTTCTCCATCTC    | 140       |
|             | <i>GLI1</i>      | 7 to 9     | CTGCAGCCAGGAATTTGACT   | CGAGGCGTGAGTATGACTTCC   | 224       |
|             | <i>GLI2</i>      | 2 to 3     | AAGCAAGAAGCCAAAAGTGG   | TGGTACCTTCCTTCTGGTG     | 188       |
|             | <i>GLI3</i>      | 2 to 3     | GGCATTTTTGGTCGAAGAGA   | GGACATTCTGTGGCTGCATA    | 238       |
|             | <i>SUFU</i>      | 2-3 to 3   | ACAGAGTCCATGAGTTTACAGG | CGTATCGTGCCAAGCCCT      | 138       |
|             | <i>PTCH1</i>     | 2-3 to 3   | GTGGAAGTTGGAGGACGAGT   | AGTCCAGGTGTTGTAGGAGC    | 154       |
|             | <i>SMO</i>       | 2 to 3     | TGCCCAAGTGTGAGAATGAC   | TACCAGCTCTTGGGGTTGTC    | 229       |
|             | <i>GAPDH</i>     | 4-5 to 6   | GGAGCGAGATCCCTCCAAAAT  | GGCTGTTGTCATACTTCTCATGG | 197       |
|             | <i>HPRT</i>      | 1-2 to 2-3 | CCTGGCGTCGTGATTAGTGAT  | AGACGTTCACTCCTGTCCATAA  | 131       |

**Supplementary Table S3.** List of primers used in this study. Two duplex PCR have been setup with 2 primers set and different control genes (i.e. *PSMC3* and *DISC1*). Size of the PCR product for the duplex depends on the presence or not of the deletion.

| Application        | Antibody                                                      | Species | Dilution | Reference                           |
|--------------------|---------------------------------------------------------------|---------|----------|-------------------------------------|
| Western blot       | Anti- $\beta$ -Tubulin                                        | Mouse   | 1/2500   | TUB-2A2, Euromedex                  |
|                    | Anti-BBS5                                                     | Rabbit  | 1/500    | 14569-1-AP, Proteintech             |
|                    | Anti-mouse (HRP linked) II <sup>ary</sup>                     | Horse   | 1/2000   | 7076, Cell signaling                |
|                    | Anti-rabbit (HRP linked) II <sup>ary</sup>                    | Donkey  | 1/2000   | 7074, Cell signaling                |
| Immunofluorescence | Anti-ARL13B                                                   | Mouse   | 1/500    | Sc-515784, Santa cruz biotechnology |
|                    | Anti-SMO                                                      | Mouse   | 1/500    | Sc-166685, Santa cruz biotechnology |
|                    | Anti- $\gamma$ -Tubulin                                       | Rabbit  | 1/500    | PA5-34815, Invitrogen               |
|                    | Anti-mouse (Alexa Fluor <sup>TM</sup> 488) II <sup>ary</sup>  | Goat    | 1/500    | A11001, Invitrogen                  |
|                    | Anti-rabbit (Alexa Fluor <sup>TM</sup> 594) II <sup>ary</sup> | Donkey  | 1/500    | A21207, Invitrogen                  |

**Supplementary Table S4.** List of antibodies used in this study.

| Program       | Version | Method                | Analysis | Detected | Nb Events | Samples |
|---------------|---------|-----------------------|----------|----------|-----------|---------|
| <b>CANOES</b> | v2      | Read depth            | WES      | No       | 4         | 11      |
| CANOES        | v2      | Read depth            | WES      | Yes      | 8         | 38      |
| CNVkit        | 0.9.9   | Read depth            | WES      | No       | 76        | 38      |
| Manta         | 1.6.0   | Paired end/Split read | WES      | No       | 17        | 38      |
| SoftSV        | 1.4.2   | Read depth/Split read | WES      | No       | 2,784     | 38      |
| Delly         | 1.1.5   | Paired end/Split read | WGS      | Yes      | 11,447    | 18      |
| <b>CANOES</b> | v2      | Read depth            | WGS      | No       | 10        | 18      |
| CNVpytor      | 1.2.1   | Read depth            | WGS      | No       | 578       | 18      |
| <b>Lumpy</b>  | 0.2.13  | Paired end/Split read | WGS      | Yes      | 14,441    | 18      |
| Manta         | 1.6.0   | Paired end/Split read | WGS      | Yes      | 11,953    | 18      |
| Smooove       | 0.2.6   | Paired end/Split read | WGS      | Yes      | 7,195     | 18      |
| <b>SoftSV</b> | 1.4.2   | Read depth/Split read | WGS      | Yes      | 15,718    | 18      |

**Supplementary Table S5.** Summary of bioinformatics CNV calling on either the WES or the WGS from All.2. Programs used for the default pipeline are highlighted in bold. Number of samples have been indicated but are relevant only regarding the read depth methods using a comparative approach including the other samples in the run.

| <b>BBS5 variant</b>       | <b>SIFT-indel</b>   | <b>DDIG</b>               | <b>Provean</b>          |
|---------------------------|---------------------|---------------------------|-------------------------|
| c.550_552dup, p.Asn184dup | Damaging<br>(0.894) | Disease causing<br>(83.8) | Deleterious<br>(-9.466) |

**Supplementary Table S6.** Prediction of the BBS5 AA duplication. The indel inframe effect was assessed using SIFT [22], DDIG [23] and Provean [24].

| HGVS (cDNA)                     | HGVS (protein)     | HGMD | Type          | Reference                                   |
|---------------------------------|--------------------|------|---------------|---------------------------------------------|
| c.1A>T                          | p.Met1?            | DM   | Start loss    | Muller (2010) Hum Genet                     |
| c.2T>A                          | p.Met1?            | DM   | Start loss    | Harville (2010) J Med Genet                 |
| c.149T>G                        | p.Leu50Arg         | DM   | Missense      | Chen (2011) Invest Ophthalmol Vis Sci       |
| c.148C>A                        | p.Leu50Ile         | DM?  | Missense      | Wang (2014) Hum Genet                       |
| c.158C>T                        | p.Thr53Ile         | DM   | Missense      | Abu-Safieh (2012) Eur J Hum Genet           |
| c.166A>G                        | p.Arg56Gly         | DM   | Missense      | Muller (2010) Hum Genet                     |
| c.214G>A                        | p.Gly72Ser         | DM   | Missense      | Hjortshoj (2008) Am J Med Genet A           |
| c.412C>T                        | p.Arg138Cys        | DM   | Missense      | Carss (2017) Am J Hum Genet                 |
| c.413G>A                        | p.Arg138His        | DM   | Missense      | Redin (2012) J Med Genet                    |
| c.532G>A                        | p.Gly178Arg        | DM   | Missense      | Shaheen (2016) Genome Biol                  |
| c.547A>G                        | p.Thr183Ala        | DM   | Missense      | Hjortshoj (2008) Am J Med Genet A           |
| c.551A>G                        | p.Asn184Ser        | DM?  | Missense      | Li (2004) Cell, Carss (2017) Am J Hum Genet |
| c.584A>G                        | p.Asp195Gly        | DM   | Missense      | Lindstrand (2016) Am J Hum Genet            |
| c.620G>A                        | p.Arg207His        | DM?  | Missense      | Li (2004) Cell                              |
| c.790G>A                        | p.Gly264Arg        | DM   | Missense      | Weisschuh (2016) PLoS One                   |
| c.889G>A                        | p.Asp297Asn        | DM?  | Missense      | Feuillan (2011) J Clin Endocrinol Metab     |
| c.265C>T                        | p.Arg89*           | DM   | Nonsense      | Hirano (2015) PLoS One                      |
| c.425T>G                        | p.Leu142*          | DM   | Nonsense      | Chandrasekar (2018) Indian J Med Res        |
| c.208+2T>C                      | p.?                | DM   | Splice        | Imani (2019) Biosci Rep                     |
| c.522+3A>G                      |                    | DM   | Splice        | Li (2004) Cell                              |
| c.619-27T>G                     |                    | DM   | Splice        | Hirano (2015) PLoS One                      |
| c.619-1G>C                      |                    | DM?  | Splice        | Feuillan (2011) J Clin Endocrinol Metab     |
| c.900G>C                        | (p.Val300=)        | DM   | Splice        | Carss (2017) Am J Hum Genet                 |
| c.123delA                       | p.(Gly42Glufs*11)  | DM   | Frameshift    | Smaoui (2006) Invest Ophthalmol Vis Sci     |
| c.734_744del11                  | p.(Glu245Glyfs*18) | DM   | Frameshift    | Maria (2016) Sci Rep                        |
| c.955_957delGAA                 | p.(Glu319del)      | DM   | Indel inframe |                                             |
| c.54dupC                        | p.(Ala19Argfs*14)  | DM   | Frameshift    | Feuillan (2011) J Clin Endocrinol Metab     |
| c.966dupT                       | p.(Ala323Cysfs*57) | DM   | Frameshift    | Al-Hamed (2014) Cilia                       |
| c.263_271delTACGAGGCCinsGCTCTTA | p.(Leu88Cysfs*3)   | DM   | Frameshift    | Li (2004) Cell                              |
| ex. 6-7, c.387-?_618+?del232    |                    | DM   | CNV           | Deveault (2011) Hum Mutat                   |
| ex. 9-12                        |                    | DM   | CNV           | Nishimura (2005) Am J Hum Genet             |
| incl. ex. 8-12                  |                    | DM   | CNV           | Lindstrand (2016) Am J Hum Genet            |

**Supplementary Table S7.** List of known *BBS5* pathogenic variants according to the HGMD pro (2021.1). The *BBS5* reference sequence used is NM\_152384.3. CNV: Copy Number Variant, DM: disease-causing mutation, “DM?”: likely disease-causing mutation.

| Family | #Patient | Sex | Ethnicity       | Cons. | Disease | Gene                                                             | HGVS nomenclature                                                                                                                                                         | Type                            | Zygosity  | RP | OB | PD | HG | RD | ID | DD | Other features                                                      | Reference                                           | PMID                 |
|--------|----------|-----|-----------------|-------|---------|------------------------------------------------------------------|---------------------------------------------------------------------------------------------------------------------------------------------------------------------------|---------------------------------|-----------|----|----|----|----|----|----|----|---------------------------------------------------------------------|-----------------------------------------------------|----------------------|
| 1      | 1        | F   | European        | N     | BBS     | <i>BBS1</i> ,<br><i>BBS5</i>                                     | <i>BBS1</i> : c.1169TG (p.Met390Arg), del ex. 10-17,<br><i>BBS5</i> : c.551A>G (p.Asn184Ser) (modifier)                                                                   | Missense, CNV,<br>Missense      | Het       | Y  | Y  | Y  |    | N  | Y  | N  | Scoliosis, otitis media                                             | Li (2004) Cell<br>Lindstrand (2016) AJHG            | 15137946<br>27486776 |
| 2      | 1        |     | European        |       | BBS     | <i>BBS5</i>                                                      | c.620G>A, p.(Arg207His)                                                                                                                                                   | Missense                        | Het       |    |    |    |    |    |    |    |                                                                     | Li (2004) Cell                                      | 15137946             |
| 3      | 2        |     | New<br>founland |       | BBS     | <i>BBS5</i>                                                      | c.522+3A>G                                                                                                                                                                | Splice                          |           |    |    |    |    |    |    |    |                                                                     | Hjortshoj (2008) AJMG A                             | 18203199             |
|        |          |     | New<br>founland |       | BBS     | <i>BBS5</i>                                                      | c.522+3A>G                                                                                                                                                                | Splice                          |           |    |    |    |    |    |    |    |                                                                     | Li (2004) Cell<br>Hjortshoj (2008) AJMG A           | 15137946<br>18203199 |
| 4      | 1        |     | Turkey          |       | BBS     | <i>BBS5</i>                                                      | c.263_271delins, p.(Leu88Cysfs*3)                                                                                                                                         | Frameshift                      | Hom       |    |    |    |    |    |    |    |                                                                     | Li (2004) Cell                                      | 15137946             |
| 5      | 1        |     | Kurdish         |       | BBS     | <i>BBS5</i>                                                      | c.176G>A, p.(Trp59*)                                                                                                                                                      |                                 | Hom       |    |    |    |    |    |    |    |                                                                     | Li (2004) Cell<br>Hjortshoj (2008) AJMG A           | 15137946<br>18203199 |
|        |          |     | Saudi<br>Arabia |       | BBS     | <i>BBS5</i>                                                      | c.181T>A/G, p.(Leu142*)                                                                                                                                                   |                                 | Hom       |    |    |    |    |    |    |    |                                                                     | Li (2004) Cell<br>Hjortshoj (2008) AJMG A           | 15137946<br>18203199 |
| 6      | 3        |     | Saudi<br>Arabia |       | BBS     | <i>BBS5</i>                                                      | c.181T>A/G, p.(Leu142*)                                                                                                                                                   |                                 | Hom       |    |    |    |    |    |    |    |                                                                     | Li (2004) Cell<br>Hjortshoj (2008) AJMG A           | 15137946<br>18203199 |
|        |          |     | Saudi<br>Arabia |       | BBS     | <i>BBS5</i>                                                      | c.181T>A/G, p.(Leu142*)                                                                                                                                                   |                                 | Hom       |    |    |    |    |    |    |    |                                                                     | Li (2004) Cell<br>Hjortshoj (2008) AJMG A           | 15137946<br>18203199 |
| 7      | 1        |     | Turkey          | Y     | BBS     | <i>BBS5</i>                                                      | Del ex. 9-12                                                                                                                                                              | CNV                             | Hom       |    | Y  | Y  |    | Y  |    |    |                                                                     | Nishimura (2005) AJHG                               | 16380913             |
| 8      | 1        | M   | Tunisian        | Y     | BBS     | <i>BBS5</i>                                                      | c.123delA, p.(Gly42Gluufs*11)                                                                                                                                             | Frameshift                      | Hom       |    |    |    |    |    |    |    |                                                                     | Smaoui (2006) IOVS                                  | 16877420             |
|        |          | M   | Somalia         | N     | BBS     | <i>BBS5</i>                                                      | c.214G>A, p.(Gly72Ser)                                                                                                                                                    | Missense                        | Hom       |    |    |    |    |    |    |    |                                                                     | Hjortshoj (2008) AJMG A                             | 18203199             |
| 9      | 4        | M   | Somalia         | N     | BBS     | <i>BBS5</i>                                                      | c.214G>A, p.(Gly72Ser)                                                                                                                                                    | Missense                        | Hom       |    |    |    |    |    |    |    |                                                                     | Hjortshoj (2008) AJMG A                             | 18203199             |
|        |          | M   | Somalia         | N     | BBS     | <i>BBS5</i>                                                      | c.214G>A, p.(Gly72Ser)                                                                                                                                                    | Missense                        | Hom       |    |    |    |    |    |    |    |                                                                     | Hjortshoj (2008) AJMG A                             | 18203199             |
|        |          | M   | Somalia         | N     | BBS     | <i>BBS5</i>                                                      | c.214G>A, p.(Gly72Ser)                                                                                                                                                    | Missense                        | Hom       |    |    |    |    |    |    |    |                                                                     | Hjortshoj (2008) AJMG A                             | 18203199             |
| 10     | 1        | M   | Sri Lanka       | N     | BBS     | <i>BBS5</i>                                                      | c.547A>G, p.(Thr183Ala)                                                                                                                                                   | Missense                        | Hom       |    |    |    |    |    |    |    |                                                                     | Hjortshoj (2008) AJMG A                             | 18203199             |
| 11     | 2        |     | North<br>Africa |       | BBS     | <i>BBS5</i>                                                      | c.1A>T, p.(Met1?)                                                                                                                                                         | Start loss                      | Hom       |    |    |    |    |    |    |    |                                                                     | Muller (2010) Hum Genet                             | 20177705             |
|        |          |     | North<br>Africa |       | BBS     | <i>BBS5</i>                                                      | c.1A>T, p.(Met1?)                                                                                                                                                         | Start loss                      | Hom       |    |    |    |    |    |    |    |                                                                     | Muller (2010) Hum Genet                             | 20177705             |
| 12     | 2        |     | North<br>Africa |       | BBS     | <i>BBS5</i>                                                      | c.166A>G, p.(Arg56Gly)                                                                                                                                                    | Missense                        | Hom       |    |    |    |    |    |    |    |                                                                     | Muller (2010) Hum Genet                             | 20177705             |
|        |          |     | North<br>Africa |       | BBS     | <i>BBS5</i>                                                      | c.166A>G, p.(Arg56Gly)                                                                                                                                                    | Missense                        | Hom       |    |    |    |    |    |    |    |                                                                     | Muller (2010) Hum Genet                             | 20177705             |
|        |          |     | Algeria         |       | BBS     | <i>BBS5</i>                                                      | c.123delA, p.(Lys41fs*52)                                                                                                                                                 | Frameshift                      | Hom       |    |    |    |    |    |    |    |                                                                     | Muller (2010) Hum Genet                             | 20177705             |
|        |          |     | Algeria         |       | BBS     | <i>BBS5</i>                                                      | c.123delA, p.(Lys41fs*52)                                                                                                                                                 | Frameshift                      | Hom       |    |    |    |    |    |    |    |                                                                     | Muller (2010) Hum Genet                             | 20177705             |
| 13     | 5        |     | Algeria         |       | BBS     | <i>BBS5</i>                                                      | c.123delA, p.(Lys41fs*52)                                                                                                                                                 | Frameshift                      | Hom       |    |    |    |    |    |    |    |                                                                     | Muller (2010) Hum Genet                             | 20177705             |
|        |          |     | Algeria         |       | BBS     | <i>BBS5</i>                                                      | c.123delA, p.(Lys41fs*52)                                                                                                                                                 | Frameshift                      | Hom       |    |    |    |    |    |    |    |                                                                     | Muller (2010) Hum Genet                             | 20177705             |
|        |          |     | Algeria         |       | BBS     | <i>BBS5</i>                                                      | c.123delA, p.(Lys41fs*52)                                                                                                                                                 | Frameshift                      | Hom       |    |    |    |    |    |    |    |                                                                     | Muller (2010) Hum Genet                             | 20177705             |
| 14     | 1        |     | Pakistan        | Y     | BBS     | <i>BBS5</i>                                                      | c.2T>A, p.(Met1?)                                                                                                                                                         | Start loss                      | Hom       | Y  | Y  | Y  | Y  | N  |    |    |                                                                     | Harville (2010) JMG                                 | 19797195             |
| 15     | 1        |     | Pakistan        | Y     | BBS     | <i>BBS5</i>                                                      | c.2T>A, p.(Met1?)                                                                                                                                                         | Start loss                      | Hom       | Y  | N  | Y  | Y  | N  |    |    |                                                                     | Harville (2010) JMG                                 | 19797195             |
| 16     | 1        |     | Tunisian        |       | BBS     | <i>BBS5</i>                                                      | c.149T>G, p.(Leu50Arg)                                                                                                                                                    | Missense                        | Hom       |    |    |    |    |    |    |    |                                                                     | Chen (2011) IOVS                                    | 21642631             |
| 17     | 1        |     | European        |       | BBS     | <i>BBS5</i>                                                      | c.619-1G>C                                                                                                                                                                | Splice                          | Hom       |    |    |    |    |    |    |    |                                                                     | Chen (2011) IOVS                                    | 21642631             |
| 18     | 1        |     |                 |       | BBS     | <i>BBS5</i>                                                      | c.889G>A, p.(Asp297Asn)                                                                                                                                                   | Missense                        | Het       |    | Y  |    |    |    |    |    | Hyperleptinemia                                                     | Feuillan (2011) JCEM                                | 21209035             |
| 19     | 1        |     |                 |       | BBS     | <i>BBS5</i>                                                      | c.619-1G>C                                                                                                                                                                | Splice                          | Het       |    | Y  |    |    |    |    |    | Hyperleptinemia                                                     | Feuillan (2011) JCEM                                | 21209035             |
| 20     | 1        |     |                 |       | BBS     | <i>BBS5</i>                                                      | c.54dupC (p.(Ala19Argfs*14)), c.619-1G>C                                                                                                                                  | Frameshift,<br>splice           | Comp. Het |    | Y  |    |    |    |    |    | Hyperleptinemia                                                     | Feuillan (2011) JCEM                                | 21209035             |
| 21     | 1        | F   | Jordanian       | Y     | BBS     | <i>BBS5</i>                                                      | Del ex. 6-7                                                                                                                                                               | CNV                             | Hom       | Y  | Y  | Y  | Y  | N  | Y  | Y  | Asthma, dislipidemia, teeth crowding, sleep apnea                   | Deveault (2011) Hum Mutat                           | 21344540             |
| 22     | 1        | M   | Somalia         | Y     | BBS     | <i>BBS5</i>                                                      | c.214G>A, p.(Gly72Ser)                                                                                                                                                    | Missense                        | Hom       | Y  | Y  | Y  |    | N  | N  | Y  | Liver structure anomaly, psychosis, teeth crowding, small genitalia | Deveault (2011) Hum Mutat                           | 21344540             |
| 23     | 1        |     | Arabe           | Y     | BBS     | <i>BBS1</i> ,<br><i>BBS9</i>                                     | <i>BBS1</i> : c.1684G>A, p.(Asp562Asn)<br><i>BBS9</i> : c.1693+102G>A                                                                                                     | Missense<br>Missense<br>Splice? | Hom       | Y  | Y  | Y  | Y  | N  | Y  | N  | Atopy, Typical facies                                               | Abu-Safieh (2012) EIHG                              | 22353939             |
| 24     | 1        |     | Arabe           | Y     | BBS     | <i>BBS1</i> ,<br><i>BBS5</i> ,<br><i>BBS4</i> ,<br><i>CEP290</i> | <i>BBS1</i> :c.124+1G>A (p.(Leu43Glyfs*44)), c.951+58C>T<br><i>BBS5</i> : c.132T>G, p.(Asn44Lys) (modifier)<br><i>BBS4</i> : c.221-37G>A<br><i>CEP290</i> : c.6271-113T>C | Splice<br>Missense              | Het       | Y  | Y  | Y  | Y  | N  | Y  | N  | Typical facies                                                      | Abu-Safieh (2010) JMG<br>Abu-Safieh (2012) EIHG     | 19858128<br>22353939 |
| 25     | 1        |     | France          | N     | BBS     | <i>BBS5</i>                                                      | c.413G>A, (p.(Arg138His))                                                                                                                                                 | Missense                        |           | Y  | N  | Y  | Y  | N  | Y  | N  | Atopy, typical facies                                               | Redin (2012) JMG                                    | 22773737             |
| 26     | 1        |     |                 |       | RP      | <i>BBS5</i>                                                      | c.148C>A, p.(Leu50Ile)                                                                                                                                                    | Missense                        | Hom       | Y  | N  | N  | N  | N  | N  | N  |                                                                     | Wang (2014) Hum Genet                               | 24154662             |
| 27     | 3        |     | Saudi<br>Arabia | Y     | BBS     | <i>BBS5</i>                                                      | c.966dupT, p.(Ala323Cysfs*57)                                                                                                                                             | Frameshift                      | Hom       | Y  | Y  | Y  | N  | Y  | Y  | N  | Hydronephrosis, enlarged fatty liver, typical facies                | Al-Hamed (2014) Cilia<br>Shaheen (2016) Genome Biol | 24559376<br>27894351 |

|    |   |   |              |   |     |      |                                                                                    |                  |           |   |   |   |   |   |   |   |                                                                                                                                                                                  |                            |          |
|----|---|---|--------------|---|-----|------|------------------------------------------------------------------------------------|------------------|-----------|---|---|---|---|---|---|---|----------------------------------------------------------------------------------------------------------------------------------------------------------------------------------|----------------------------|----------|
| 28 | 2 | M | Saudi Arabia | Y | BBS | BBS5 | c.966dupT, p.(Ala323Cysfs*57)                                                      | Frameshift       | Hom       | N | Y | Y | N | Y | Y | N | Fatty liver, typical facies, atopy                                                                                                                                               | Al-Hamed (2014) Cilia      | 24559376 |
|    |   | M | Saudi Arabia | Y | BBS | BBS5 | c.966dupT, p.(Ala323Cysfs*57)                                                      | Frameshift       | Hom       | N | Y | N | N | Y | Y | N | Hydronephrosis, fatty liver, typical facies, atopy                                                                                                                               | Shaheen (2016) Genome Biol | 27894351 |
| 29 | 1 | M | Japanese     | N | BBS | BBS5 | c.265C>T (p.Arg89*), c.619-27T>G                                                   | Nonsense, Splice | Comp. Het | N | Y | N | Y | N | Y | N | Esophageal, gastric and rectal varices, liver fibrosis                                                                                                                           | Al-Hamed (2014) Cilia      | 24559376 |
|    |   | M | Japanese     | N | BBS | BBS5 | c.265C>T (p.Arg89*), c.619-27T>G                                                   | Nonsense, Splice | Comp. Het | N | Y | Y | Y | N | Y | N | Esophageal, gastric and rectal varices, liver fibrosis                                                                                                                           | Shaheen (2016) Genome Biol | 27894351 |
| 30 | 1 | M | European     | N | BBS | BBS5 | BBS1: c.1645G>T (p.Glu549*), del ex. 1-11, BBS5: c.584A>G (p.Asp195Gly) (modifier) | CNV, frameshift  | Het       | Y | Y | Y |   | Y | Y | Y | Scoliosis, otitis media                                                                                                                                                          | Hirano (2015) PLoS One     | 26325687 |
|    |   | M | European     | N | BBS | BBS5 | BBS10: c.2119_2120delGT (p.Val707*) hom BBS5: incl. ex. 8-12                       | Missense CNV CNV | Het       | Y | Y | Y |   | Y | Y |   | Seizures, sleep apnea                                                                                                                                                            | Hirano (2015) PLoS One     | 26325687 |
| 31 | 1 |   |              | Y | BBS | BBS5 | c.966dupT, p.(Ala323Cysfs*57)                                                      | Frameshift       | Hom       | Y | Y | Y | Y | Y | Y | N | Grade 4 bilateral hydronephrosis, small trabeculated bladder                                                                                                                     | Lindstrand (2016) AJHG     | 27486776 |
| 32 | 1 |   |              | Y | BBS | BBS5 | c.966dupT, p.(Ala323Cysfs*57)                                                      | Frameshift       | Hom       | Y | Y | N | N | N | N | N | Brachydactyly, atopy, asthma, hypogenitalism, typical facies                                                                                                                     | Lindstrand (2016) AJHG     | 27486776 |
| 33 | 2 |   |              | Y | BBS | BBS5 | c.966dupT, p.(Ala323Cysfs*57)                                                      | Frameshift       | Hom       | N | Y | N | N | N | Y | N | Acanthosis nigricans, macrocephaly, poor vision                                                                                                                                  | Shaheen (2016) Genome Biol | 27894351 |
|    |   |   |              | Y | BBS | BBS5 | c.966dupT, p.(Ala323Cysfs*57)                                                      | Frameshift       | Hom       | N | Y | N | N | N | Y | N | Acanthosis nigricans, macrocephaly, poor vision                                                                                                                                  | Shaheen (2016) Genome Biol | 27894351 |
| 34 | 1 |   |              | Y | BBS | BBS5 | c.966dupT, p.(Ala323Cysfs*57)                                                      | Frameshift       | Hom       | N | Y | N | Y | N | Y | N | Acanthosis nigricans, macrocephaly, poor vision                                                                                                                                  | Shaheen (2016) Genome Biol | 27894351 |
| 35 | 2 | M | Pakistani    | Y | BBS | BBS5 | c.734_744del11, p.(Glu245Glyfs*18)                                                 | Frameshift       | Hom       | Y | N | Y | Y | Y | Y | N | Hypodontia, syndactyly, brachydactyly, ataxia, speech disability, gall bladder calculi, mild spleno- and hepatomegaly, elevated liver enzymes, abnormally high cholesterol level | Maria (2016) Sci Rep       | 27708425 |
|    |   | M | Pakistani    | Y | BBS | BBS5 | c.734_744del11, p.(Glu245Glyfs*18)                                                 | Frameshift       | Hom       | Y | N | N | Y | Y | Y | N | Speech disability                                                                                                                                                                | Maria (2016) Sci Rep       | 27708425 |
| 36 | 1 | F | Pakistani    | Y | BBS | BBS5 | c.734_744del11, p.(Glu245Glyfs*18)                                                 | Frameshift       | Hom       | Y | N | Y | Y | N | N | Y | Irregular menstruation, low progesterone levels, diabetes, borderline hepatomegaly with fatty infiltration, abnormally high cholesterol level, elevated liver enzymes            | Maria (2016) Sci Rep       | 27708425 |
| 37 | 2 |   |              |   | BBS | BBS5 | c.790G>A, p.(Gly264Arg)                                                            | Missense         | Hom       | N | Y | N | N | N | N |   | Achromatopsia in childhood                                                                                                                                                       | Weisschuh (2016) PLoS One  | 26766544 |
|    |   |   |              |   | BBS | BBS5 | c.790G>A, p.(Gly264Arg)                                                            | Missense         | Hom       | N | Y | N | N | N | N |   | Achromatopsia in childhood                                                                                                                                                       | Weisschuh (2016) PLoS One  | 26766544 |
| 38 | 2 |   |              | Y |     | BBS5 | c.532G>A, p.(Gly178Arg)                                                            | Missense         | Hom       | Y | Y | N | N | N | N | Y |                                                                                                                                                                                  | Shaheen (2016) Genome Biol | 27894351 |
|    |   |   |              | Y |     | BBS5 | c.532G>A, p.(Gly178Arg)                                                            | Missense         | Hom       | N | Y | N | N | N | N | Y | Nystagmus, poor vision, sleep apnea, delayed myelination                                                                                                                         | Shaheen (2016) Genome Biol | 27894351 |
| 39 | 1 |   |              | Y |     | BBS5 | c.1A>T, p.?                                                                        | Start loss       | Hom       | N | Y | Y | N | Y | N | N |                                                                                                                                                                                  | Shaheen (2016) Genome Biol | 27894351 |
| 40 | 1 |   |              |   | BBS | BBS5 | c.955_957delGAA, p.(Glu319del)                                                     | Indel inframe    | Hom       |   |   | Y |   |   |   | Y | Small testis, CHD, ADHD, dysmorphic facies, echogenic kidneys, cleft lip, normal brain MRI, echogenic kidney                                                                     | Patel (2016) Genet Med     | 26355662 |
| 41 | 1 | F |              |   | CD  | BBS5 | c.900G>C, p.(Val300=)                                                              | Splice           | Het       | Y | N | N | N | N | N | N |                                                                                                                                                                                  | Shaheen (2016) Genome Biol | 27894351 |
| 42 | 1 | F |              |   | CD  | BBS5 | c.412C>T, p.(Arg138Cys)                                                            | Missense         | Het       | Y | N | N | N | N | N | N |                                                                                                                                                                                  | Carss (2017) AJHG          | 28041643 |
| 43 | 1 | F |              |   | CD  | BBS5 | c.551A>G, p.(Asn184Ser)                                                            | Missense         | Het       | Y | N | N | N | N | N | N |                                                                                                                                                                                  | Carss (2017) AJHG          | 28041643 |
| 44 | 1 | M | Indian       | N | BBS | BBS5 | c.425T>G, p.(Leu142*)                                                              | Nonsense         | Hom       |   |   |   |   |   |   |   |                                                                                                                                                                                  | Chandrasekar (2018) IJMR   | 29806606 |
| 45 | 2 | M | Iranian      | N | BBS | BBS5 | c.208+2T>C                                                                         | Splice           | Hom       | Y | Y | N | Y | N | N | N | Speech disability, dental anomaly, attenuated arterioles, pale optic disc, night blindness                                                                                       | Imani (2019) Biosci Rep    | 30850397 |
|    |   | F | Iranian      | N | BBS | BBS5 | c.208+2T>C                                                                         | Splice           | Hom       | Y | Y | N | N | Y | N | N | Posterior subcapsular cataract, digestion problem, attenuated arterioles, pale optic disc, bone spicules, macular atrophy, night blindness                                       | Imani (2019) Biosci Rep    | 30850397 |

**Supplementary Table S8.** List of known *BBS5* cases with pathogenic variants organized as case according to the HGMD pro (2021.1). The *BBS5* reference sequence used is NM\_152384.3. When multiple gene are indicated in the gene column, the first one is considered as the primary driver gene. CNV: Copy Number Variant, Hom: homozygous, Het: heterozygous, Comp. het: compound heterozygous, CD: Cone dystrophy, RP: Retinitis pigmentosa, Ob: Obesity, PD: Polydactyly, HG: Hypogonadism, RD: Renal disease, ID: Intellectual disability DD: Developmental delay, CHD: Congenital heart disease, ADHD: Attention deficit hyperactivity disorder.

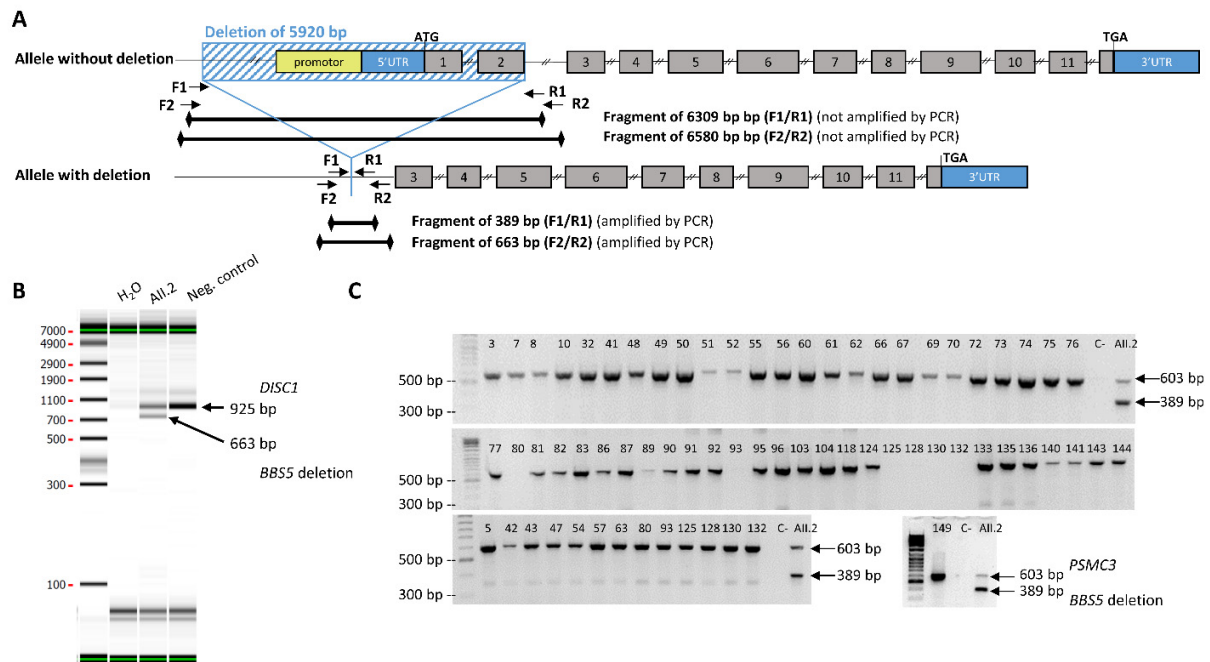

**Supplementary Figure S1.** Cohort screening for the *BBS5* deletion. **A.** Presentation of the primers positions on *BBS5* for Duplex 1 and 2 designed for the detection of the deletion of exons 1 and 2. **B.** Example of PCR profiles for Duplex 2 on a LabChip GX (Perkin Elmer) for a rapid detection of the *BBS5* deletion (see for primers details). Normal samples harbour a single band (*DISC1*) whereas homozygous or heterozygous carriers for the tandem duplication show an additional band specific for the duplication breakpoint. **C.** Results of the Duplex 1 PCR performed on 62 BBS negative samples out of 284. Except for the index case, the deletion was not found in any other patient.





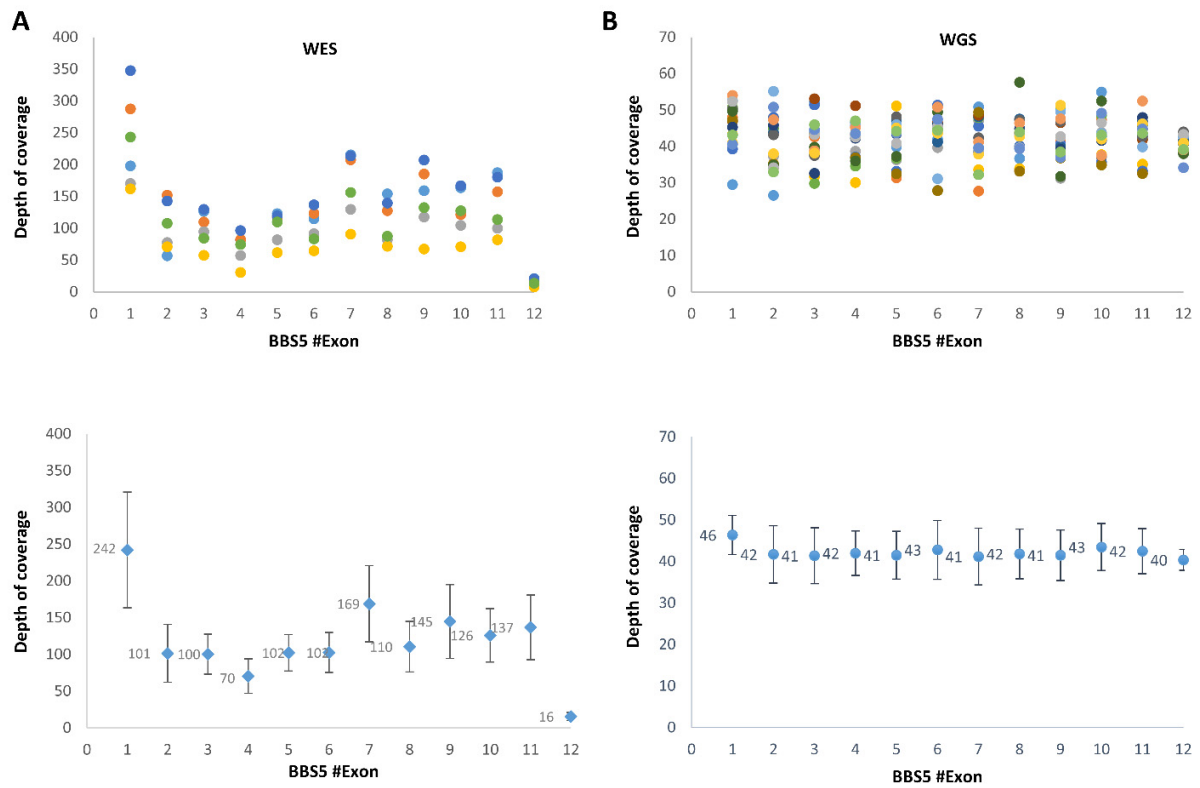

**Supplementary Figure S3.** Distribution of the depth of coverage (upper panels) and the mean and its standard deviation (lower panels) for each exon of *BBS5* for 6 WES from the same sequencing run (A.) and for 18 WGS (B.). Depth of coverage was computed using the DepthOfCoverage command from GenomeAnalysisTK-3.4-46 and the GRCh37 reference coordinates for the *BBS5* gene (NM\_152384.3).

Wildtype

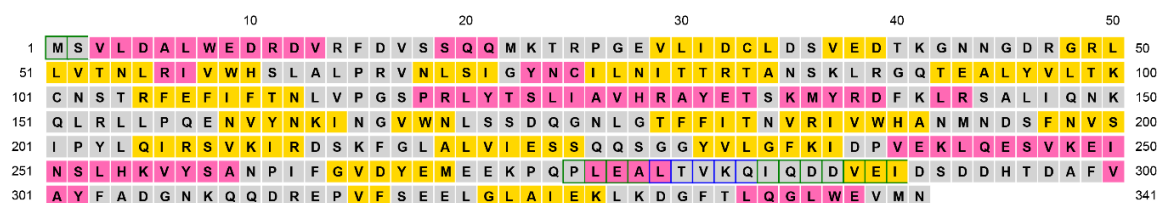

p.Asn184dup

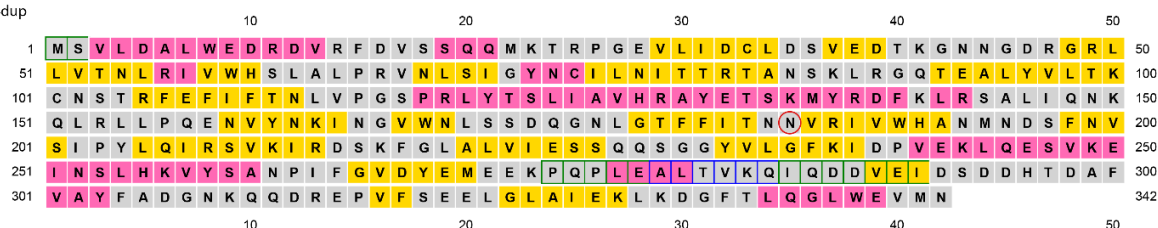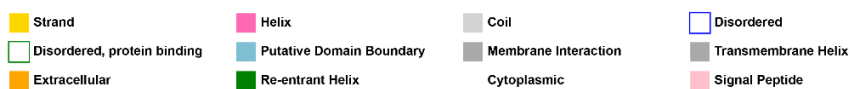

**Supplementary Figure S4. Secondary structure prediction.** PSIPRED [25] was applied to assess whether the p.Asn184dup (panel below, duplication is highlighted by a red circle) might affect the secondary structure of BBS5.

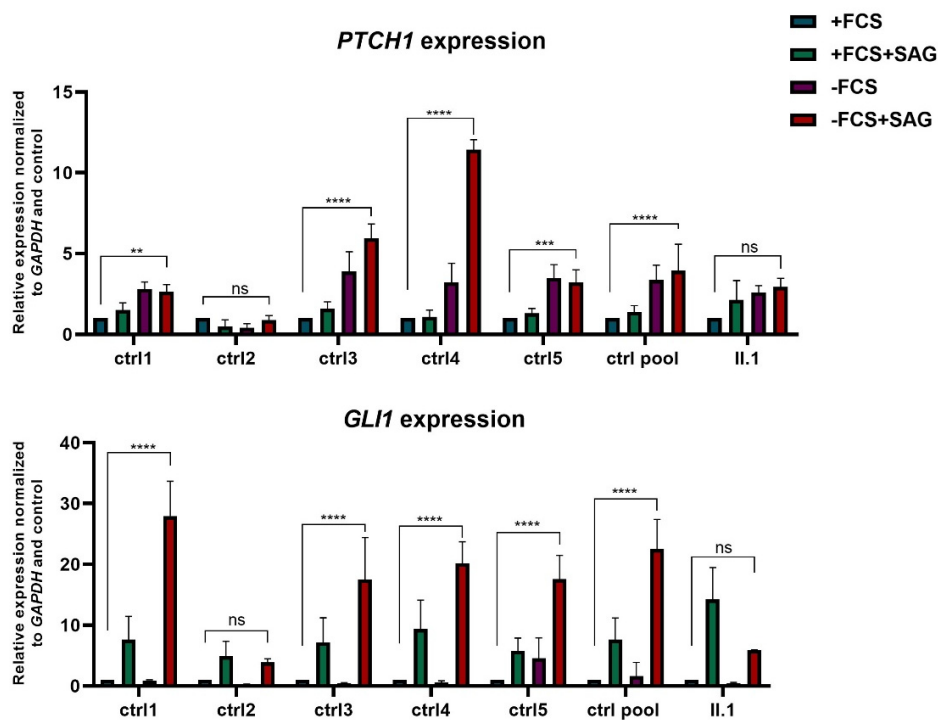

**Supplementary Figure S5.** Assessment of Hh-signal transduction by quantification of the induction of two Hh target genes *PTCH1* and *GLI1* on Hh-stimulated cells from controls and the patient in four different conditions, with and without inducing ciliogenesis (+/- FCS) and Hh activation (+/- SAG). The expression of both genes is normally induced in controls except in control 2, whereas no induction is found in the patient test. The expression data performed with biological triplicates were normalized to the reference gene *GAPDH* mRNA expression data, and the values were presented as relative expression levels  $\pm$  SEM). *p*-values and significance were determined using 2-way ANOVA test (Tukey's multiple comparison test). ns: non significant, \*\* $p < 0.01$  \*\*\*\* $p < 0.0001$ .

## SUPPLEMENTARY REFERENCES

1. Thorvaldsdóttir, H.; Robinson, J.T.; Mesirov, J.P. Integrative Genomics Viewer (IGV): High-Performance Genomics Data Visualization and Exploration. *Briefings in Bioinformatics* **2012**, *14*, 178–192, doi:10.1093/bib/bbs017.
2. Li, H.; Durbin, R. Fast and Accurate Short Read Alignment with Burrows–Wheeler Transform. *Bioinformatics* **2009**, *25*, 1754–1760, doi:10.1093/bioinformatics/btp324.
3. DePristo, M.A.; Banks, E.; Poplin, R.; Garimella, K.V.; Maguire, J.R.; Hartl, C.; Philippakis, A.A.; del Angel, G.; Rivas, M.A.; Hanna, M.; et al. A Framework for Variation Discovery and Genotyping Using Next-Generation DNA Sequencing Data. *Nature Genetics* **2011**, *43*, 491–498, doi:10.1038/ng.806.
4. Geoffroy, V.; Pizot, C.; Redin, C.; Piton, A.; Vasli, N.; Stoetzel, C.; Blavier, A.; Laporte, J.; Muller, J. VaRank: A Simple and Powerful Tool for Ranking Genetic Variants. *PeerJ* **2015**, *3*, e796, doi:10.7717/peerj.796.
5. The 1000 Genomes Project Consortium; Gibbs, R.A.; Boerwinkle, E.; Doddapaneni, H.; Han, Y.; Korchina, V.; Kovar, C.; Lee, S.; Muzny, D.; Reid, J.G.; et al. A Global Reference for Human Genetic Variation. *Nature* **2015**, *526*, 68–74, doi:10.1038/nature15393.
6. Lek, M.; Karczewski, K.J.; Minikel, E.V.; Samocha, K.E.; Banks, E.; Fennell, T.; O'Donnell-Luria, A.H.; Ware, J.S.; Hill, A.J.; Cummings, B.B.; et al. Analysis of Protein-Coding Genetic Variation in 60,706 Humans. *Nature* **2016**, *536*, 285–+, doi:10.1038/nature19057.
7. MacDonald, J.R.; Ziman, R.; Yuen, R.K.C.; Feuk, L.; Scherer, S.W. The Database of Genomic Variants: A Curated Collection of Structural Variation in the Human Genome. *Nucleic Acids Res.* **2014**, *42*, D986–992, doi:10.1093/nar/gkt958.
8. Nevers, Y.; Prasad, M.K.; Poidevin, L.; Chennen, K.; Allot, A.; Kress, A.; Ripp, R.; Thompson, J.D.; Dollfus, H.; Poch, O.; et al. Insights into Ciliary Genes and Evolution from Multi-Level Phylogenetic Profiling. *Molecular Biology and Evolution* **2017**, *34*, 2016–2034, doi:10.1093/molbev/msx146.
9. Thung, D.T.; de Ligt, J.; Vissers, L.E.; Steehouwer, M.; Kroon, M.; de Vries, P.; Slagboom, E.P.; Ye, K.; Veltman, J.A.; Hehir-Kwa, J.Y. Mobster: Accurate Detection of Mobile Element Insertions in next Generation Sequencing Data. *Genome Biology* **2014**, *15*, 488, doi:10.1186/s13059-014-0488-x.
10. Geoffroy, V.; Herenger, Y.; Kress, A.; Stoetzel, C.; Piton, A.; Dollfus, H.; Muller, J. AnnotSV: An Integrated Tool for Structural Variations Annotation. *Bioinformatics* **2018**, doi:10.1093/bioinformatics/bty304.
11. Talevich, E.; Shain, A.H.; Botton, T.; Bastian, B.C. CNVkit: Genome-Wide Copy Number Detection and Visualization from Targeted DNA Sequencing. *PLOS Computational Biology* **2016**, *12*, e1004873, doi:10.1371/journal.pcbi.1004873.
12. Suvakov, M.; Panda, A.; Diesh, C.; Holmes, I.; Abyzov, A. CNVpytor: A Tool for Copy Number Variation Detection and Analysis from Read Depth and Allele Imbalance in Whole-Genome Sequencing. *Gigascience* **2021**, *10*, giab074, doi:10.1093/gigascience/giab074.
13. Rausch, T.; Zichner, T.; Schlattl, A.; Stütz, A.M.; Benes, V.; Korbel, J.O. DELLY: Structural Variant Discovery by Integrated Paired-End and Split-Read Analysis. *Bioinformatics* **2012**, *28*, i333–i339, doi:10.1093/bioinformatics/bts378.
14. Layer, R.M.; Chiang, C.; Quinlan, A.R.; Hall, I.M. LUMPY: A Probabilistic Framework for Structural Variant Discovery. *Genome Biol* **2014**, *15*, R84, doi:10.1186/gb-2014-15-6-r84.
15. Backenroth, D.; Homsy, J.; Murillo, L.R.; Glessner, J.; Lin, E.; Brueckner, M.; Lifton, R.; Goldmuntz, E.; Chung, W.K.; Shen, Y.F. CANOES: Detecting Rare Copy Number Variants from Whole Exome Sequencing Data. *Nucleic Acids Res* **2014**, *42*, doi:10.1093/nar/gku345.

16. Chen, X.; Schulz-Trieglaff, O.; Shaw, R.; Barnes, B.; Schlesinger, F.; Källberg, M.; Cox, A.J.; Kruglyak, S.; Saunders, C.T. Manta: Rapid Detection of Structural Variants and Indels for Germline and Cancer Sequencing Applications. *Bioinformatics* **2016**, *32*, 1220–1222, doi:10.1093/bioinformatics/btv710.
17. Bartenhagen, C.; Dugas, M. Robust and Exact Structural Variation Detection with Paired-End and Soft-Clipped Alignments: SoftSV Compared with Eight Algorithms. *Briefings in Bioinformatics* **2016**, *17*, 51–62, doi:10.1093/bib/bbv028.
18. Huerta-Cepas, J.; Szklarczyk, D.; Forslund, K.; Cook, H.; Heller, D.; Walter, M.C.; Rattei, T.; Mende, D.R.; Sunagawa, S.; Kuhn, M.; et al. EggNOG 4.5: A Hierarchical Orthology Framework with Improved Functional Annotations for Eukaryotic, Prokaryotic and Viral Sequences. *Nucleic Acids Research* **2015**, *44*, D286–D293, doi:10.1093/nar/gkv1248.
19. Singh, S.K.; Gui, M.; Koh, F.; Yip, M.C.; Brown, A. Structure and Activation Mechanism of the BBSome Membrane Protein Trafficking Complex. *Elife* **2020**, *9*, doi:10.7554/eLife.53322.
20. Waterhouse, A.M.; Procter, J.B.; Martin, D.M.A.; Clamp, M.; Barton, G.J. Jalview Version 2--a Multiple Sequence Alignment Editor and Analysis Workbench. *Bioinformatics* **2009**, *25*, 1189–1191, doi:10.1093/bioinformatics/btp033.
21. Schrödinger, LLC The PyMOL Molecular Graphics System, Version 1.8 2015.
22. Hu, J.; Ng, P.C. SIFT Indel: Predictions for the Functional Effects of Amino Acid Insertions/Deletions in Proteins. *PLoS One* **2013**, *8*, e77940, doi:10.1371/journal.pone.0077940.
23. Zhao, H.; Yang, Y.; Lin, H.; Zhang, X.; Mort, M.; Cooper, D.N.; Liu, Y.; Zhou, Y. DDIG-in: Discriminating between Disease-Associated and Neutral Non-Frameshifting Micro-Indels. *Genome Biology* **2013**, *14*, R23, doi:10.1186/gb-2013-14-3-r23.
24. Choi, Y.; Chan, A.P. PROVEAN Web Server: A Tool to Predict the Functional Effect of Amino Acid Substitutions and Indels. *Bioinformatics* **2015**, *31*, 2745–2747, doi:10.1093/bioinformatics/btv195.
25. Buchan, D.W.A.; Jones, D.T. The PSIPRED Protein Analysis Workbench: 20 Years On. *Nucleic Acids Research* **2019**, *47*, W402–W407, doi:10.1093/nar/gkz297.
